# Supplementary material for: Higher mid-term revision rates of posterior stabilized compared with cruciate retaining total knee arthroplasties: 133,841 cemented arthroplasties for osteoarthritis in the Netherlands in 2007–2016
Source: PubMed Central journal article supplement (PMC6300738; doi:10.1080/17453674.2018.1518570), 2018-10-23
Supplement: IORT_A_1518570_SM3055.pdf [file IORT_A_1518570_SM3055.pdf]

## Supplementary data

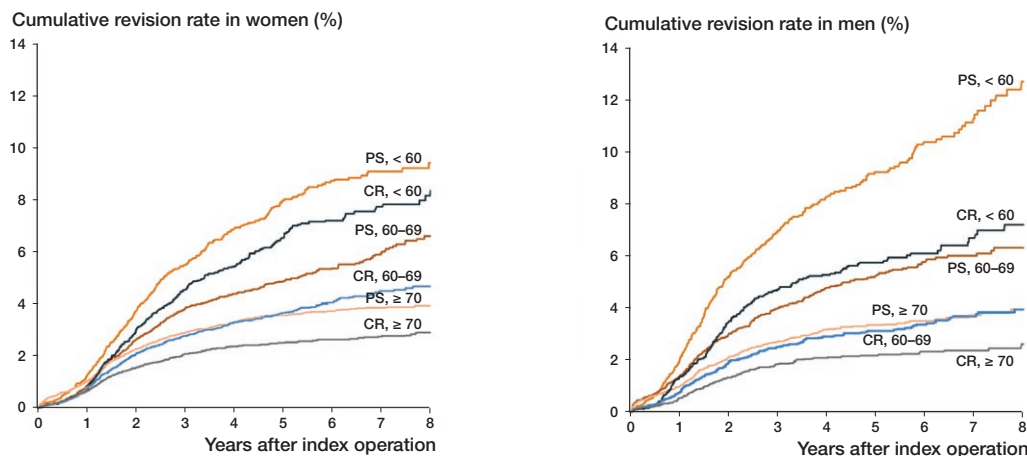

Figure 2. Cumulative revision rates of cemented cruciate retaining or posterior stabilized fixed bearing total knee arthroplasties for osteoarthritis by type of knee system per age category, stratified for sex, in the Netherlands in 2007–2016 (n = 133,841). CR: cruciate retaining TKA system; PS: posterior stabilized TKA system.

Table 4. Cumulative 8-year revision rates of cemented fixed bearing total knee arthroplasties for osteoarthritis with cruciate retaining (CR) or posterior stabilized (PS) knee system, stratified for sex, age, and ASA score, in the Netherlands in 2007–2016 (n = 133,841)

| Sex, age<br>ASA-score        | CR TKA system |                               | PS TKA system |                               |
|------------------------------|---------------|-------------------------------|---------------|-------------------------------|
|                              | n             | 8-year revision rate (%) (CI) | n             | 8-year revision rate (%) (CI) |
| <b>Male, &lt; 60 years</b>   |               |                               |               |                               |
| ASA I                        | 1,561         | 7.2 (5.6–9.2) <sup>a</sup>    | 1,753         | 12.1 (9.8–15.0) <sup>a</sup>  |
| ASA II                       | 2,105         | 7.8 (6.0–10.3) <sup>a</sup>   | 2,605         | 14.4 (11.4–18.1) <sup>a</sup> |
| ASA III–IV                   | 236           | 6.1 (3.3–11.3)                | 347           | 13.0 (7.7–22.2)               |
| Total                        | 4,015         | 7.2 (6.1–8.5) <sup>a</sup>    | 4,842         | 12.7 (11.1–14.5) <sup>a</sup> |
| <b>Male, 60–69 years</b>     |               |                               |               |                               |
| ASA I                        | 1,975         | 2.7 (2.0–3.7) <sup>a</sup>    | 2,161         | 5.6 (4.4–7.2) <sup>a</sup>    |
| ASA II                       | 5,127         | 4.3 (3.5–5.2) <sup>a</sup>    | 6,408         | 6.5 (5.6–7.7) <sup>a</sup>    |
| ASA III–IV                   | 890           | 4.9 (3.3–7.5)                 | 1,057         | 7.6 (5.5–10.6)                |
| Total                        | 8,193         | 4.0 (3.4–4.7) <sup>a</sup>    | 9,835         | 6.3 (5.6–7.1) <sup>a</sup>    |
| <b>Male, ≥ 70 years</b>      |               |                               |               |                               |
| ASA I                        | 1,091         | 3.4 (2.0–5.6)                 | 1,310         | 5.5 (4.1–7.5)                 |
| ASA II                       | 5,766         | 2.3 (1.9–2.9)                 | 6,765         | 3.4 (2.8–4.2)                 |
| ASA III–IV                   | 1,546         | 2.2 (1.5–3.4)                 | 2,034         | 4.0 (2.9–5.5)                 |
| Total                        | 8,621         | 2.6 (2.2–3.2) <sup>a</sup>    | 10,365        | 4.0 (3.4–4.6) <sup>a</sup>    |
| <b>Female, &lt; 60 years</b> |               |                               |               |                               |
| ASA I                        | 1,717         | 8.3 (6.7–10.4)                | 2,124         | 8.7 (7.1–10.7)                |
| ASA II                       | 3,444         | 7.5 (6.3–8.9)                 | 4,579         | 9.6 (8.3–11.0)                |
| ASA III–IV                   | 533           | 8.9 (4.4–18.1)                | 728           | 11.9 (8.7–16.4)               |
| Total                        | 5,876         | 8.2 (7.2–9.3)                 | 7,648         | 9.4 (8.5–10.5)                |
| <b>Female, 60–69 years</b>   |               |                               |               |                               |
| ASA I                        | 2,690         | 5.7 (4.6–7.2)                 | 3,070         | 5.4 (4.2–7.0)                 |
| ASA II                       | 9,030         | 4.0 (3.5–4.7) <sup>a</sup>    | 11,011        | 7.2 (6.2–8.3) <sup>a</sup>    |
| ASA III–IV                   | 1,410         | 5.9 (4.3–8.1)                 | 1,916         | 7.9 (6.0–10.5)                |
| Total                        | 13,499        | 4.7 (4.2–5.3)                 | 16,400        | 6.6 (6.0–7.3)                 |
| <b>Female, ≥ 70 years</b>    |               |                               |               |                               |
| ASA I                        | 2,259         | 2.0 (1.4–2.8) <sup>a</sup>    | 2,524         | 4.4 (3.5–5.6) <sup>a</sup>    |
| ASA II                       | 14,016        | 3.0 (2.7–3.5) <sup>a</sup>    | 16,562        | 4.0 (3.6–4.5) <sup>a</sup>    |
| ASA III–IV                   | 3,280         | 3.1 (2.4–4.0)                 | 4,120         | 3.8 (3.0–4.7)                 |
| Total                        | 20,187        | 2.9 (2.6–3.3) <sup>a</sup>    | 23,984        | 4.0 (3.6–4.3) <sup>a</sup>    |

TKA: total knee arthroplasty.

<sup>a</sup> p < 0.05 for PS compared with CR TKAs.

Table 5. Cumulative minor and major 8-year revision rates of cemented fixed bearing total knee arthroplasties for osteoarthritis by type of TKA system, stratified for sex and age, in the Netherlands in 2007–2016 (n = 133,841)

| Type of revision, sex<br>Age, years                             | CR TKA system |                               | PS TKA system |                               |
|-----------------------------------------------------------------|---------------|-------------------------------|---------------|-------------------------------|
|                                                                 | n             | 8-year revision rate (%) (CI) | n             | 8-year revision rate (%) (CI) |
| <b>Minor (only insert and/or patella exchange <sup>a</sup>)</b> |               |                               |               |                               |
| <b>Male</b>                                                     |               |                               |               |                               |
| < 60                                                            | 4,015         | 1.8 (1.4–2.5) <sup>b</sup>    | 4,842         | 3.7 (3.0–4.7) <sup>b</sup>    |
| 60–69                                                           | 8,193         | 1.1 (0.8–1.5)                 | 9,835         | 1.8 (1.4–2.2)                 |
| ≥ 70                                                            | 8,624         | 0.7 (0.4–1.2)                 | 10,365        | 1.3 (1.0–1.7)                 |
| Total                                                           | 20,844        | 1.1 (0.9–1.3) <sup>b</sup>    | 25,061        | 2.0 (1.7–2.3) <sup>b</sup>    |
| <b>Female</b>                                                   |               |                               |               |                               |
| < 60                                                            | 5,876         | 1.2 (0.9–1.6) <sup>b</sup>    | 7,648         | 2.7 (2.1–3.4) <sup>b</sup>    |
| 60–69                                                           | 13,499        | 0.8 (0.6–1.1)                 | 16,400        | 1.2 (0.9–1.5)                 |
| ≥ 70                                                            | 20,187        | 0.4 (0.3–0.6) <sup>b</sup>    | 23,984        | 0.8 (0.7–1.0) <sup>b</sup>    |
| Total                                                           | 39,596        | 0.7 (0.6–0.8) <sup>b</sup>    | 48,064        | 1.3 (1.1–1.4) <sup>b</sup>    |
| <b>Major (including femur or tibia)</b>                         |               |                               |               |                               |
| <b>Male</b>                                                     |               |                               |               |                               |
| < 60                                                            | 4,015         | 4.2 (3.3–5.3) <sup>b</sup>    | 4,842         | 7.0 (5.6–8.7) <sup>b</sup>    |
| 60–69                                                           | 8,193         | 2.0 (1.6–2.5) <sup>b</sup>    | 9,835         | 3.3 (2.7–3.9) <sup>b</sup>    |
| ≥ 70                                                            | 8,624         | 1.1 (0.9–1.5)                 | 10,365        | 1.5 (1.2–2.0)                 |
| Total                                                           | 20,844        | 2.1 (1.8–2.4) <sup>b</sup>    | 25,061        | 3.4 (3.0–3.8) <sup>b</sup>    |
| <b>Female</b>                                                   |               |                               |               |                               |
| < 60                                                            | 5,876         | 5.2 (4.4–6.2)                 | 7,648         | 4.7 (4.0–5.5)                 |
| 60–69                                                           | 13,499        | 2.6 (2.2–3.1) <sup>b</sup>    | 16,400        | 3.8 (3.3–4.4) <sup>b</sup>    |
| ≥ 70                                                            | 20,187        | 1.7 (1.5–2.0)                 | 23,984        | 2.0 (1.8–2.3)                 |
| Total                                                           | 39,596        | 2.5 (2.3–2.7) <sup>b</sup>    | 48,064        | 3.0 (2.8–3.3) <sup>b</sup>    |

<sup>a</sup> Excluding patella addition.

<sup>b</sup> p < 0.05 for PS compared with CR TKAs.

Table 6. Reasons for minor or major revisions of cruciate retaining and posterior stabilized cemented fixed bearing TKA systems for osteoarthritis in the Netherlands in 2007–2016

| Reason for revision          | Minor revision <sup>a</sup> (n = 1,046) |                         | Major revision <sup>b</sup> (n = 2,149) |                            | Any revision <sup>c</sup> (n = 4,377) |                            |
|------------------------------|-----------------------------------------|-------------------------|-----------------------------------------|----------------------------|---------------------------------------|----------------------------|
|                              | CR (n = 333)<br>n (%)                   | PS (n = 713)<br>n (%)   | CR (n = 911)<br>n (%)                   | PS (n = 1,238)<br>n (%)    | CR (n = 1,718)<br>n (%)               | PS (n = 2,659)<br>n (%)    |
| Patellar pain                | 102 (30.6)                              | 18 (26.2)               | 84 (9.2)                                | 145 (11.7)                 | 549 (32.0)                            | 842 (31.7)                 |
| Instability                  | 138 (41.4)                              | 263 (36.9)              | 327 (35.9)                              | 284 (22.9) <sup>g, h</sup> | 477 (27.8)                            | 567 (21.3) <sup>g, h</sup> |
| Loosening tibial component   | 0 (0.0)                                 | 3 (0.4)                 | 242 (26.6)                              | 505 (40.8) <sup>g, h</sup> | 243 (14.1)                            | 513 (19.3) <sup>g, h</sup> |
| Infection                    | 67 (20.1)                               | 207 (29.0) <sup>f</sup> | 161 (17.7)                              | 252 (20.4)                 | 244 (14.2)                            | 499 (18.8) <sup>g, h</sup> |
| Malalignment                 | 6 (1.8)                                 | 11 (1.5)                | 254 (27.9)                              | 371 (30.0)                 | 265 (15.4)                            | 387 (14.6)                 |
| Loosening femoral component  | 1 (0.3)                                 | 1 (0.1)                 | 78 (8.6)                                | 117 (9.5)                  | 80 (4.7)                              | 119 (4.5)                  |
| Arthrofibrosis               | 20 (6.0)                                | 30 (4.2)                | 32 (3.5)                                | 55 (4.4)                   | 61 (3.6)                              | 93 (3.5)                   |
| Revision after removal       | 0 (0.0)                                 | 1 (0.1)                 | 48 (5.3)                                | 97 (7.8) <sup>e</sup>      | 48 (2.8)                              | 98 (3.7)                   |
| Patellar dislocation         | 10 (3.0)                                | 15 (2.1)                | 37 (4.1)                                | 30 (2.4) <sup>e</sup>      | 74 (4.3)                              | 71 (2.7) <sup>e</sup>      |
| Wear of inlay                | 18 (5.4)                                | 33 (4.6)                | 18 (2.0)                                | 25 (2.0)                   | 37 (2.2)                              | 61 (2.3)                   |
| Periprosthetic fracture      | 0 (0.0)                                 | 6 (0.8)                 | 21 (2.3)                                | 69 (5.6) <sup>f</sup>      | 21 (1.2)                              | 75 (2.8) <sup>f</sup>      |
| Loosening patellar component | 10 (3.0)                                | 14 (2.0)                | 6 (0.7)                                 | 9 (0.7)                    | 20 (1.2)                              | 31 (1.2)                   |
| Other reason for revision    | 53 (15.6)                               | 118 (15.3)              | 112 (12.3)                              | 122 (9.9) <sup>d</sup>     | 219 (12.7)                            | 315 (11.8)                 |

<sup>a</sup> Only insert and/or patella exchange (excluding patella addition).

<sup>b</sup> Revision of at least femur or tibia.

<sup>c</sup> Any type of revision, including patella addition (CR n = 402; PS n = 555). A patellar component was placed during the primary procedure of 17.7% (n = 10,668) of cruciate retaining TKAs and of 28.5% (n = 20,831) of posterior stabilized TKAs.

<sup>d</sup> p = 0.03

<sup>e</sup> p = 0.01

<sup>f</sup> p = 0.001

<sup>g</sup> p < 0.001

<sup>h</sup> Categories differ significantly for PS compared with CR TKAs after applying a Bonferroni correction (p = 0.05/39=0.001).
